# Supplementary material for: A CO2-gated anodic aluminum oxide based nanocomposite membrane for de-emulsification
Source: Royal Society of Chemistry journal article supplement (doi:10.1039/d0nr04248j), 2020-01-01
Supplement: d0nr04248j1.pdf [file d0nr04248j1.pdf]

Electronic Supporting Information (ESI)

**CO<sub>2</sub>-gated anodic aluminum oxide based nanocomposite membrane  
for de-emulsification**

*Xia Huang<sup>1,2</sup>, Hatice Mutlu<sup>2</sup>, and Patrick Theato<sup>1,2,\*</sup>*

<sup>1</sup>Institute for Chemical Technology and Polymer Chemistry (ITCP), Karlsruhe Institute of Technology (KIT), Engesserstr.18, D-76131, Karlsruhe, Germany

<sup>2</sup>Soft Matter Laboratory, Institute for Biological Interfaces III (IBG 3), Karlsruhe Institute of Technology (KIT), Herrmann-von-Helmholtz-Platz 1, D-76344, Eggenstein-Leopoldshafen, Germany

\*Corresponding author

Prof. Patrick Theato

E-mail: [patrick.theato@kit.edu](mailto:patrick.theato@kit.edu)

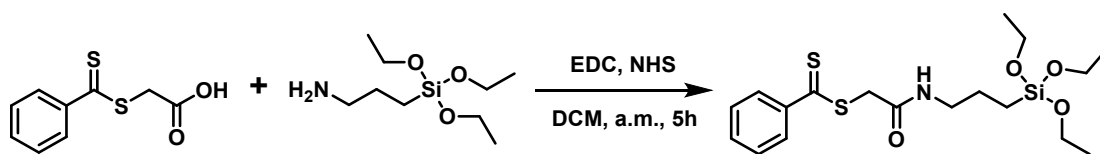

**Scheme S1.** Synthesis of silanized chain transfer agent 2-oxo-2-((3-(triethoxysilyl)propyl)amino)ethyl benzodithioate (SiO-CTA)

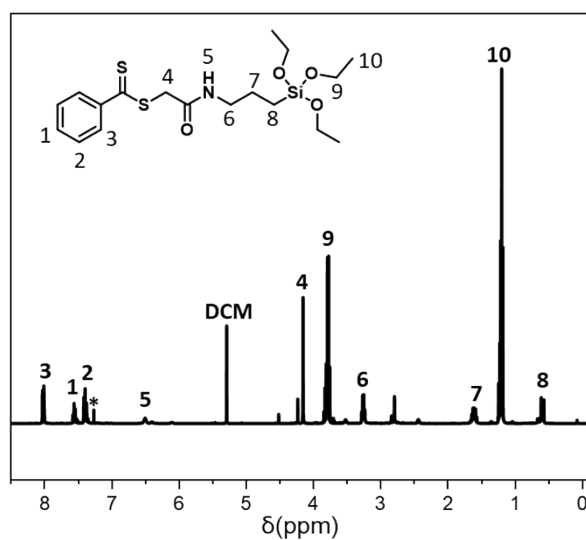

**Figure S1.**  $^1\text{H}$  NMR (400 MHz,  $\text{CDCl}_3$ ) spectrum of silanized chain transfer agent 2-oxo-2-((3-(triethoxysilyl)propyl)amino)ethyl benzodithioate (SiO-CTA). The \* indicates the residual signal of the solvent  $\text{CHCl}_3$ .

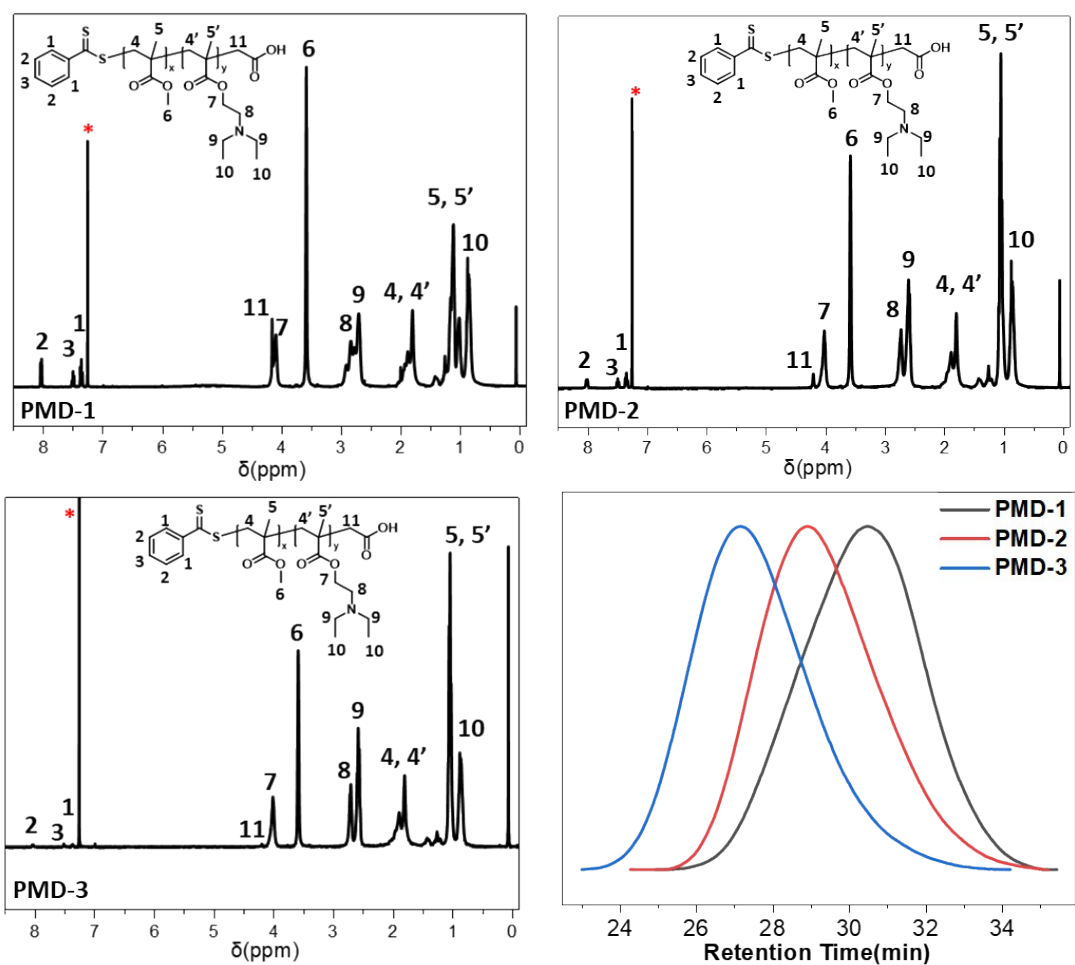

**Figure S2.**  $^1\text{H}$  NMR (400 MHz,  $\text{CDCl}_3$ ) spectrum and GPC curve of in DMAc of PMD-1, PMD-2 and PMD-3. The \* indicates the residual signal of the solvent  $\text{CHCl}_3$ .

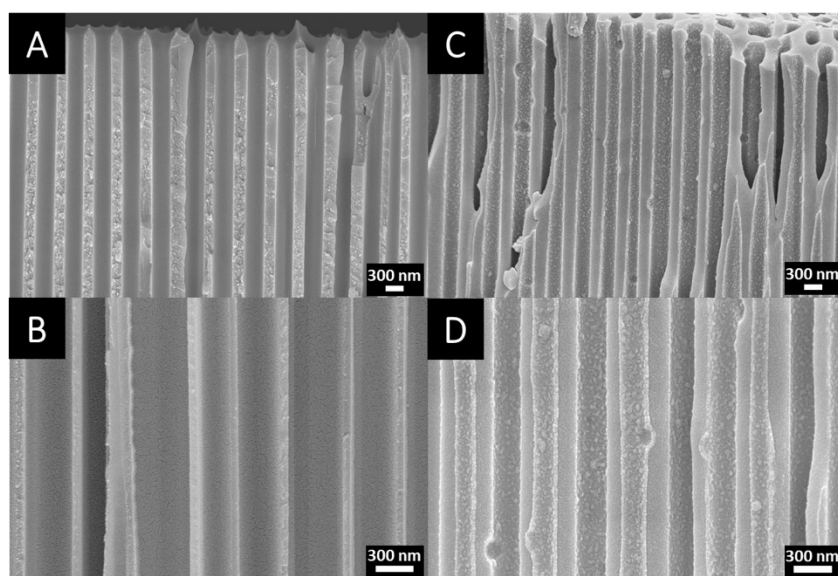

*Figure S3. Comparative cross-section SEM images of (A, B) pristine AAO, (C, D) AAO-g-PMD*

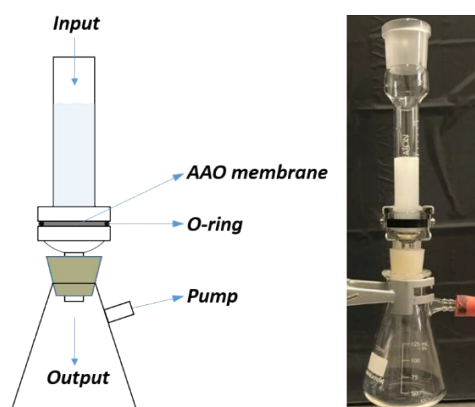

*Figure S4. A schematic (left) and optical image (right) of flux measurement cell.*
